# Supplementary material for: Template-directed synthesis of silica-coated J-aggregate nanotapes
Source: Royal Society of Chemistry journal article supplement (doi:10.1039/b502436f), 2005-01-01
Supplement: b502436f.pdf [file b502436f.pdf]

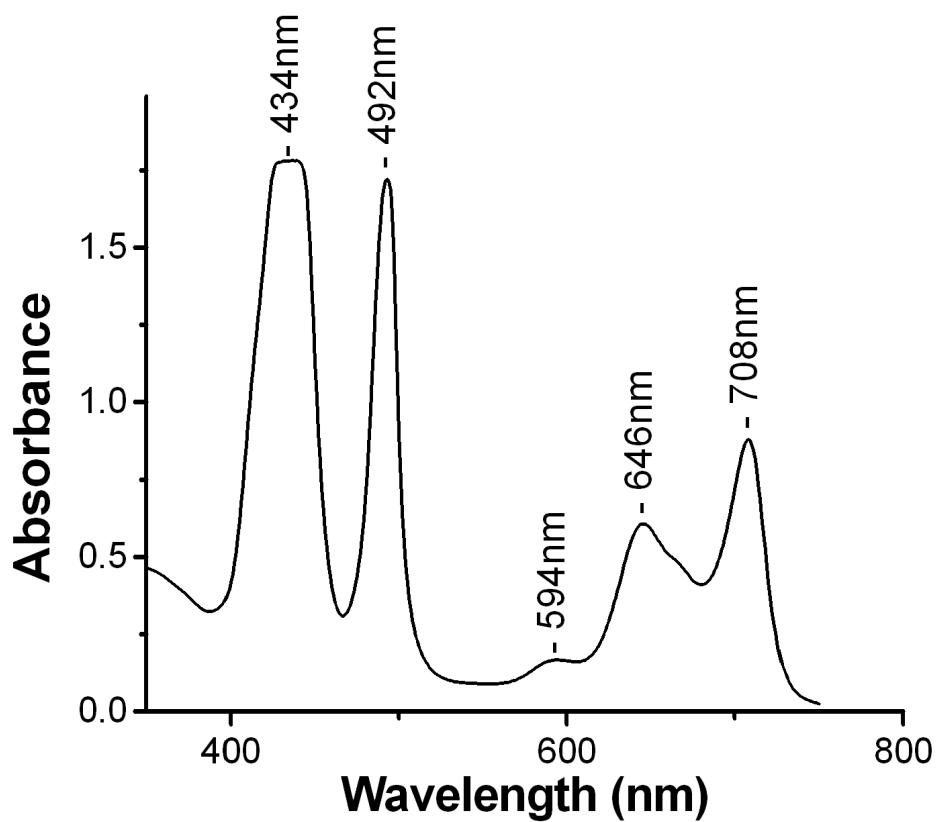

UV-vis spectrum of unmineralized J-aggregate nanofilaments at pH 2.

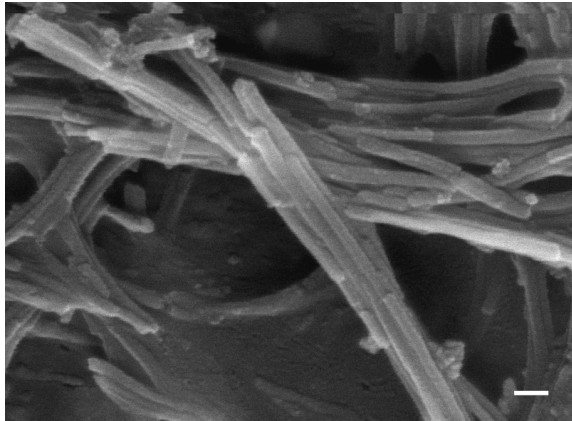

SEM image of calcined nanorods showing intact silica nanofilaments. Scale bar 100nm.
